# Supplementary material
Source: MDPI journal article supplement (https://www.mdpi.com/1999-4907/12/8/1124)
Supplement: s1 [file s1]

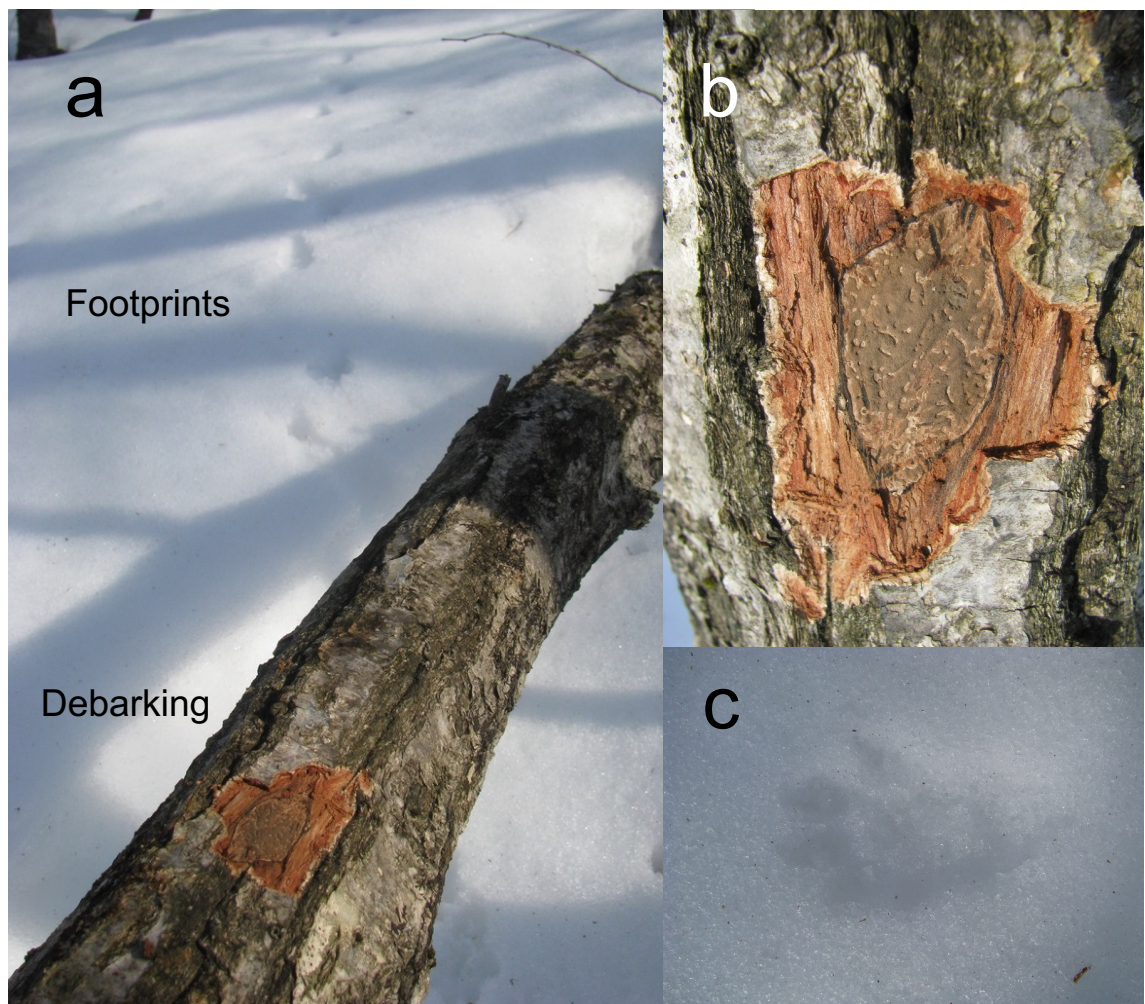

Figure S1

Another evidence of debarking of *Quercus serrata* log by squirrel targeting on ascomycete anamorph. (a) Footprint of a squirrel and debarking on a *Q. serrata* log. (b) Debarked surface of *Q. serrata* log. Powdery anamorph spores were almost removed (probably by squirrel). (c) Footprint on snow. Photo by Yu Fukasawa on 14 February 2021.
