# Supplementary material
Source: MDPI journal article supplement (https://www.mdpi.com/1999-4907/12/8/1124)
Supplement: s1 [file s1]

Archive with 2 entries (2 files):
- Squirrel_FigS.pdf
- Squirrel_TableS.xlsx
