# Supplementary material
Source: MDPI journal article supplement (https://www.mdpi.com/1999-4907/12/8/1124)
Supplement: s1 [file s1 › Squirrel_TableS.xlsx]

## Sheet: Sheet1
Table S1 Insect taxa recorded in the present study.
Taxa	Family	Order
Machilidae spp.	Machilidae	Archaeognatha
Aphaulimia debilis	Anthribidae	Coleoptera
Citacalus pygidialis	Anthribidae	Coleoptera
Noxius japonicus	Anthribidae	Coleoptera
Platystomos sellatus	Anthribidae	Coleoptera
Biphyllus rufopictus	Biphyllidae	Coleoptera
Mesosa japonica	Cerambycidae	Coleoptera
Mesosa longipennis	Cerambycidae	Coleoptera
Parmulus politus	Corylophidae	Coleoptera
Cryptolestes ferrugineus	Cucujidae	Coleoptera
Laemophloeus submonilis	Cucujidae	Coleoptera
Placonotus testaceus	Cucujidae	Coleoptera
Xylolestes hilleri	Cucujidae	Coleoptera
Xylolestes laevior	Cucujidae	Coleoptera
Acicnemidinae sp.	Curculionidae	Coleoptera
Acicnemis dorsonigrita	Curculionidae	Coleoptera
Tritoma latifasciata	Erotylidae	Coleoptera
Niponius osorioceps	Histeridae	Coleoptera
Latridiidae sp.	Latridiidae	Coleoptera
Leiodidae sp.	Leiodidae	Coleoptera
Sphaeroliodes rufescens	Leiodidae	Coleoptera
Ivania coccinea	Melandryidae	Coleoptera
Librodor ipsoides	Nitidulidae	Coleoptera
Monotopion ferrugineum	Rhizophagidae	Coleoptera
Scaphidiidae sp.1	Scaphidiidae	Coleoptera
Scaphidiidae sp.2	Scaphidiidae	Coleoptera
Scaphidiidae sp.3	Scaphidiidae	Coleoptera
Silvanus bidentatus	Silvanidae	Coleoptera
Plesiophthalmus nigrocyaneus	Tenebrionidae	Coleoptera
Aradus esakii	Aradidae	Hemiptera
Aradus orientalis	Aradidae	Hemiptera
Neuroctenus ater	Aradidae	Hemiptera
Neuroctenus castaneus	Aradidae	Hemiptera
Pheidole fervida	Formicidae	Hymenoptera
Lepidoptera sp.1		Lepidoptera
Lepidoptera sp.2		Lepidoptera
Lepidoptera sp.3		Lepidoptera
Psocodea sp.		Psocodea
